# Supplementary material for: Bill Redness Is Positively Associated with Reproduction and Survival in Male and Female Zebra Finches
Source: PubMed Central journal article supplement (PMC3395645; doi:10.1371/journal.pone.0040721), 2012-07-12

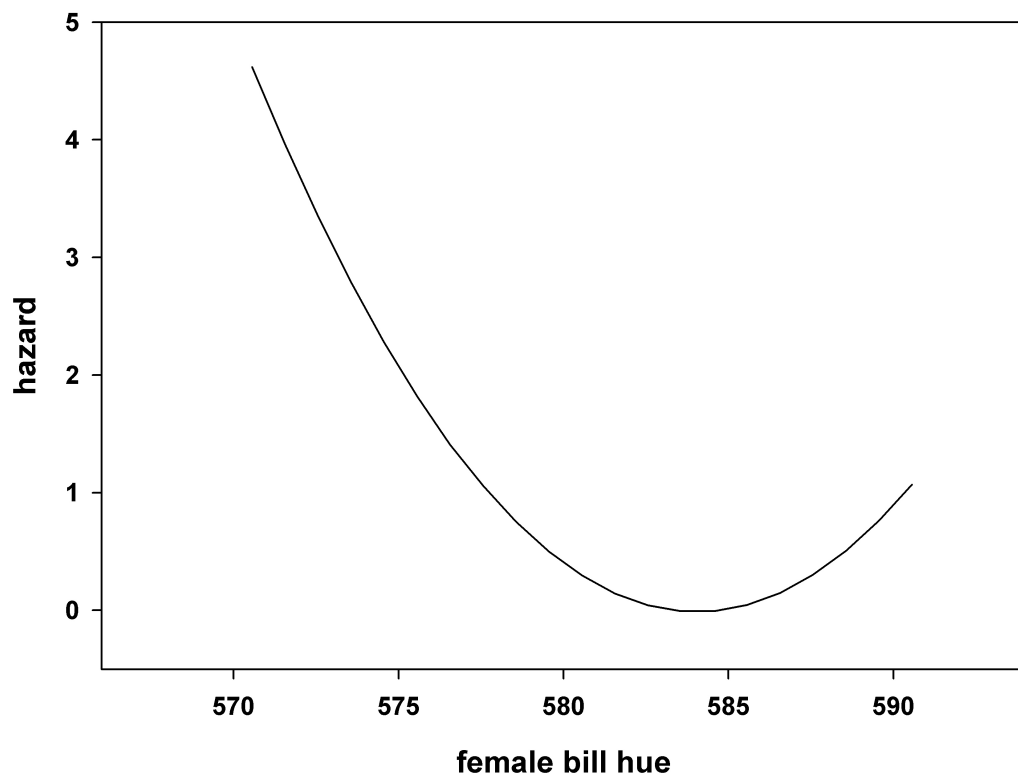

Supplement: pone.0040721.s001.pdf [file pone.0040721.s001.pdf]
