# Supplementary material for: Bill Redness Is Positively Associated with Reproduction and Survival in Male and Female Zebra Finches
Source: PubMed Central journal article supplement (PMC3395645; doi:10.1371/journal.pone.0040721), 2012-07-12
Supplement: pone.0040721.s002.pdf [file pone.0040721.s002.pdf]

| <b>variable</b>                                                                        | <b>batch 1</b> | <b>batch 2</b> | <b>Wilcoxon<br/>test</b> |
|----------------------------------------------------------------------------------------|----------------|----------------|--------------------------|
| <b>fledging produced in the<br/>two seasons of follow up</b>                           | 4              | 21             | $p= 0.0028$              |
| <b>broods (which included hatchlings)<br/>produced in the two seasons of follow up</b> | 2              | 8              | $p= 0.011$               |
| <b>fledglings per brood</b>                                                            | 1.5            | 3              | $p= 0.016$               |
